# Supplementary material for: A common inversion under selection in Europeans
Source: Springer Nature journal article supplement (doi:10.1038/ng1508), 2005-01-16
Supplement: ng1508-S12.pdf [file ng1508-S12.pdf]

**Supplementary Table 5.** Primer sequences for markers shown in **Figures 1** and **3**. Genotype and amplicon size is given when available. H1 and H2 amplicon sizes were obtained from sequenced clones with their accession number and name.

| Name     | Forward primer          | Reverse primer           | RP11        |             | Amplicon size                       |                                                         |
|----------|-------------------------|--------------------------|-------------|-------------|-------------------------------------|---------------------------------------------------------|
|          |                         |                          | Genotype H1 | Genotype H2 | H1                                  | H2                                                      |
| DI7S633  | GGTGGAGCTTGCAGTGAGCTGAG | AGAACAGGAATGGGAAAGGCTTTC | 188         | 186         | 182 <sup>1</sup>                    |                                                         |
| DI7S791  | GTTTTCTCCAGTTATTCCCC    | GCTCGTCCTTTGGAAGAGTT     | 181         | 193         |                                     | 189 <sup>15</sup>                                       |
| DI7S810  | CCCTGTACCCGACTCAGAA     | GCCTGGTTGCATAACCC        | 243         | 249         | 236 <sup>1</sup>                    | 242 <sup>10</sup>                                       |
| DI7S920  | CTTCTGCATGGATCAGAAAA    | ACTCACCCAGATGATTGCTT     | 106         | 102         |                                     | 99 <sup>15</sup>                                        |
| DG17S5   | GCATCCCTGTCTCAATCACA    | CATAGCATTCCCTCCTCTGC     | 252         | 248         | 245 <sup>5</sup>                    | 241 <sup>4</sup>                                        |
| DG17S10  | GATGAAGGAAGGGCAGTGAG    | CAGGGCAATCCTTGAGGTAG     | 177         | 177         | 170 <sup>5</sup>                    |                                                         |
| DG17S11  | CCGAAACCGAATCTGAAATC    | GGGAAGGGCAACTAAAGTGA     | 284         | 284         | 276 <sup>5</sup>                    | 276 <sup>5</sup>                                        |
| DG17S133 | GCCTGGGAAACAAGAGTGAG    | CCAGAGGTCCTAGTGCCAAA     | 172;180     | 176;208     | 172 <sup>2</sup> ;164 <sup>7</sup>  | 199 <sup>11</sup> ;168 <sup>12</sup> ;168 <sup>13</sup> |
| DG17S136 | CCTGGCTTCTACCAAACA      | TCCTCTCCAGTGGGTTCTTG     | 277         | 249         | 273 <sup>9</sup>                    |                                                         |
| DG17S137 | CACAGAGATGTGCAGCCAAA    | TGAGGCTGCAGTGAGTTGAG     | 154         | 146         |                                     | 136 <sup>4</sup>                                        |
| DG17S142 | CTGCTTCCTCCCTGTGTGT     | GGGAAGGTGAAGACGAGAGT     | 398         | 404         |                                     | 394 <sup>5</sup>                                        |
| DG17S144 | AGTAGGCTGAGGAGGGAGGA    | GCAAGTCTCCCTGTGGAAT      | 291         | 257         |                                     |                                                         |
| DG17S146 | TGCAAGCAGTTTAAGCAGGA    | CCACAACCTGGCTGTCTCAC     | 391         | 403;407     | 384 <sup>7</sup>                    | 401 <sup>11</sup> ;397 <sup>13</sup>                    |
| DG17S153 | AGATCACGCCACTGCATC      | ACCAACACAGGATGGTAGGC     | 267         | 252;272     | 261 <sup>7</sup>                    | 266 <sup>11</sup> ;245 <sup>13</sup>                    |
| DG17S158 | GACCACCTTTGTGTGCTTCA    | GGTGTTTCAGGGAAACAGTCTT   | 189;197     | 198;201     | 188 <sup>5</sup> ;180 <sup>9</sup>  |                                                         |
| DG17S159 | TCATTCTGGCTCCCTGTCTT    | TCAGGTTCTCAAATGAGGAGTAGG | 125;129     | 129;141     | 120 <sup>3</sup> ;124 <sup>14</sup> |                                                         |
| DG17S160 | GCAATCATACTCCGTTGCAG    | ATGACGGGACTTGTGTGGAT     | 396         | 392;408     | 384 <sup>9</sup> ;384 <sup>14</sup> |                                                         |
| DG17S161 | GAACCTATGATTGCGTCAAC    | CTTAGAGCTTTGACTCAGGT     | 209         | 209;215     | 202 <sup>9</sup>                    | 202 <sup>15</sup>                                       |
| DG17S332 | TAAGCTCCATGGACCTGTT     | AAAGAGCAGACAAGGCCAAG     | 223         | 223         | 216 <sup>2</sup>                    |                                                         |
| DG17S338 | GCAAATTCCAAATAGCTCAGGA  | AGGACTACTGGCCACAACA      | 435         | 406         | 428 <sup>5</sup>                    | 397 <sup>5</sup>                                        |
| DG17S340 | CTCCCTGCAGAGGTTTCAAG    | GGGAGGATAGCTGGAGATGG     |             |             |                                     | 108 <sup>5</sup>                                        |
| DG17S435 | GCAGGGTACCACCTTATTC     | GGAGGTGAGCCATGATTGAG     | 171;176     | 175;176     | 168 <sup>2</sup> ;163 <sup>7</sup>  | 167 <sup>11</sup> ;168 <sup>12</sup>                    |
| DG17S436 | CACCAAGCTATTAAGCAGCAAAG | CAATGGAGCAAGACCCTGTT     | 259         | 259         | 252 <sup>1</sup> ;249 <sup>9</sup>  | 249 <sup>13</sup>                                       |
| DG17S462 | CGAGGCTCTGACTCCAAAAA    | CCAGCTGAGAACATGTGTTGAT   | 87          | 79          |                                     |                                                         |
| DG17S465 | ATAGCAGGCCATACCACCTC    | TCACTTGAACCTGGGAGACA     | 168         | 198         |                                     |                                                         |
| Del238   | GGAAGACGTTCTACTGATCTG   | AGGAGTCTGGCTTCACTCTCTC   |             |             |                                     | 246 <sup>5</sup>                                        |

Note: Clones from the chromosome specific assembly (**Fig. 1**) in which amplicon sequences for the markers above were found:

- <sup>1</sup>AC091132.16, RP11-798G7
- <sup>2</sup>AC126544.5, RP11-707O23
- <sup>3</sup>AC073426.3, RP11-733O21
- <sup>4</sup>AC090769.1, RP11-80L9
- <sup>5</sup>AC036218.3, RP11-413P22
- <sup>6</sup>BX544879.6, RP11-769P22
- <sup>7</sup>AC005829.1, RP11-259G18
- <sup>8</sup>AC138687.2, RP11-297E22
- <sup>9</sup>AC046170.6, RP11-219F9
- <sup>10</sup>AC021584.2, RP11-94M7
- <sup>11</sup>AC126604.5, RP11-507F3
- <sup>12</sup>AC048388.17, RP11-374N3
- <sup>13</sup>AC139677.4, RP11-1070B7
- <sup>14</sup>AC138645.3, RP11-995C19
- <sup>15</sup>AC019319.8, RP11-220N20
